# Supplementary material
Source: publisher figshare collection journal article supplement (https://tandf.figshare.com/ndownloader/files/14143712)
Supplement: Supplementary file 1 [file 14143712]

Supplementary Table 1. Clinicopathological information for the glioma patients

Case No. Gender Age (years) Location WHO Grade

1 M 64 Insular lobe left Grade II

2 F 31 Frontal lobe left Grade II

3 M 52 Frontal lobe right Grade II

4 F 63 Temporal lobe left Grade II

5 M 42 Frontal lobe right Grade II

6 M 43 Temporal lobe right Grade II

7 F 48 Frontal lobe right Grade II

8 M 40 Frontal lobe left Grade II

9 F 49 Frontal lobe right Grade II

10 F 27 Frontal lobe right Grade II

11 M 52 Frontal lobe left Grade III

12 F 19 Frontal lobe right Grade III

13 F 75 Frontal lobe left Grade III

14 M 47 Temporal lobe right Grade III

15 M 50 Temporal lobe right Grade III

16 F 58 Temporal lobe left Grade III

17 M 56 Bilateral temporal lobe Grade III

18 F 58 Temporal lobe right Grade IV

19 M 47 Temporal lobe right Grade IV

20 M 43 Temporal lobe left Grade IV

21 F 50 Frontal lobe right Grade IV

22 F 62 Temporal lobe left Grade IV

23 M 61 Temporal lobe left Grade IV

24 F 34 Temporal lobe right Grade IV

25 M 60 Frontal lobe right Nontumor

26 F 57 Cerebelli right Nontumor

27 M 17 Cerebelli Nontumor

28 F 61 Temporal lobe left Nontumor

29 F 54 Temporal lobe right Nontumor

30 M 32 Temporal lobe left Nontumor

31 F 47 Temporal lobe left Nontumor

32 M 40 Cerebelli Nontumor

33 M 48 Temporal lobe right Nontumor

Note:F, Female; M, Male. WHO, World Health Organization.
